# Supplementary material for: Sulfonated poly(styrene-divinylbenzene-glycidyl methacrylate)-capsulated magnetite nanoparticles as a recyclable catalyst for one-step biodiesel production from high free fatty acid-containing feedstocks
Source: Royal Society of Chemistry journal article supplement (doi:10.1039/c7nj05075e), 2018-01-01
Supplement: c7nj05075e1.pdf [file c7nj05075e1.pdf]

**Sulfonated poly(styrene-divinylbenzene-glycidyl methacrylate)-capsulated magnetite nanoparticles as a recyclable catalyst for one-step biodiesel production from high free fatty acid-containing feedstocks**

Jinming Chang<sup>a,b</sup>, Xiaoyu Guan<sup>a</sup>, Siyu Pan<sup>a</sup>, Maolin Jia<sup>a</sup>, Yi Chen<sup>a\*</sup>, Haojun Fan<sup>a</sup>

<sup>a</sup> Key Laboratory of Leather Chemistry and Engineering of Ministry of Education, Sichuan University, Chengdu 610065, P.R. China.

<sup>b</sup> Institute of Applied Chemistry, China West Normal University, Nanchong 637009, P.R. China.

\* Corresponding author. *E-mail address*: chen\_yi\_leon@scu.edu.

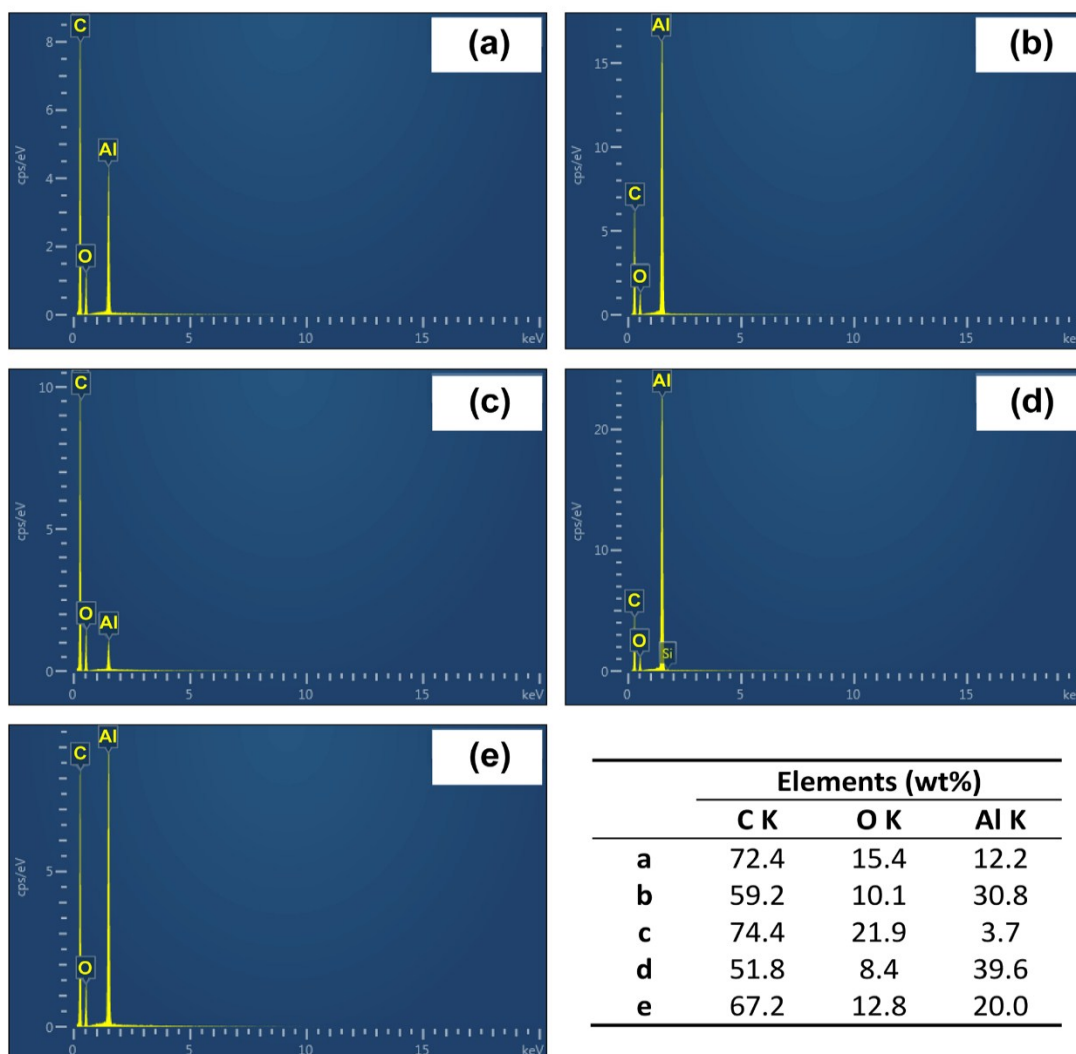

**Figure S1.** Energy dispersive X-ray (EDX) spectra of char residues obtained from thermogravimetric analysis of the resultant biodiesel by using MNPs@PST@SO<sub>3</sub>H as catalyst in five cycles. (a) cycle 1; (b) cycle 2; (c) cycle 3; (d) cycle 4 and (e) cycle 5.
